# Supplementary material
Source: PubMed Central journal article supplement (PMC4505790)
Supplement: supp_btn536_bioinf-2008-0661-File002.pdf [file supp_btn536_bioinf-2008-0661-File002.pdf]

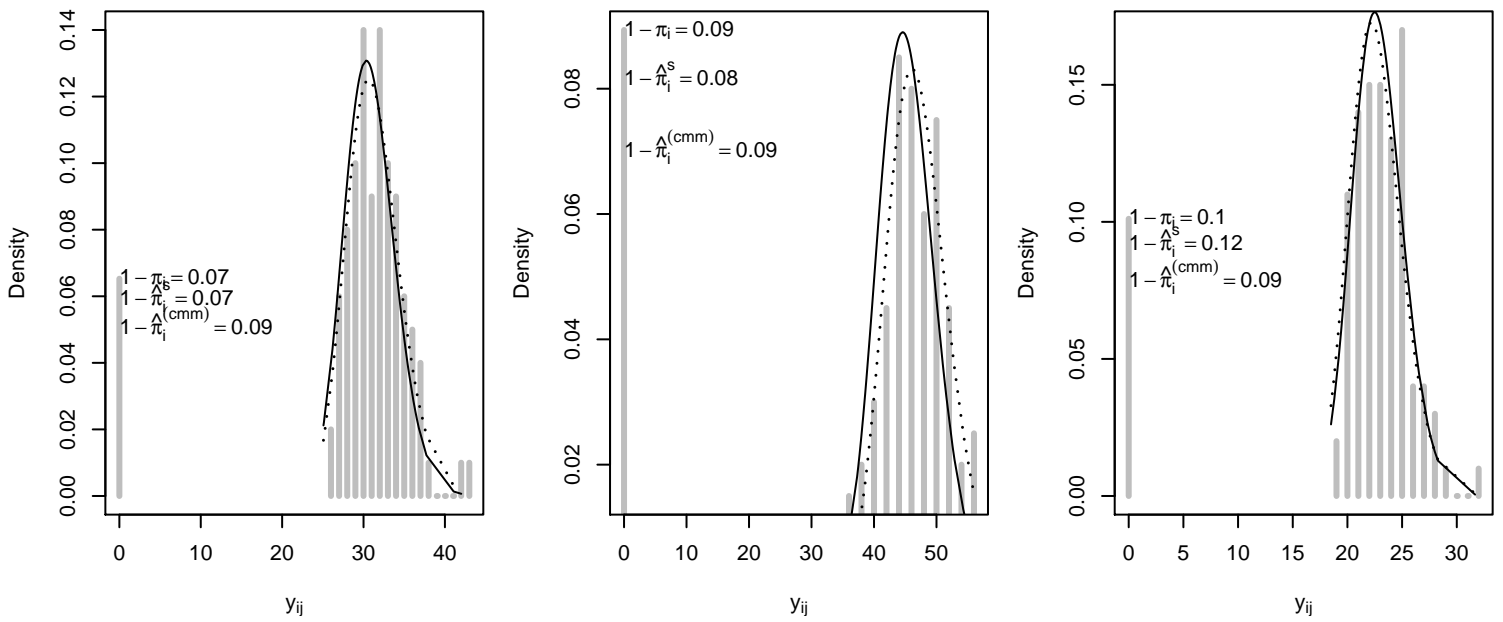

Supplementary Figure 1. Model misspecification. Here  $Y_{ij}$  is simulated from a log-normal (LNN) distribution. Solid lines are the true density function and dotted lines are the CMM fitted density function.
