# Supplementary material
Source: PubMed Central journal article supplement (PMC4505790)
Supplement: supp_btn536_bioinf-2008-0661-File003.pdf [file supp_btn536_bioinf-2008-0661-File003.pdf]

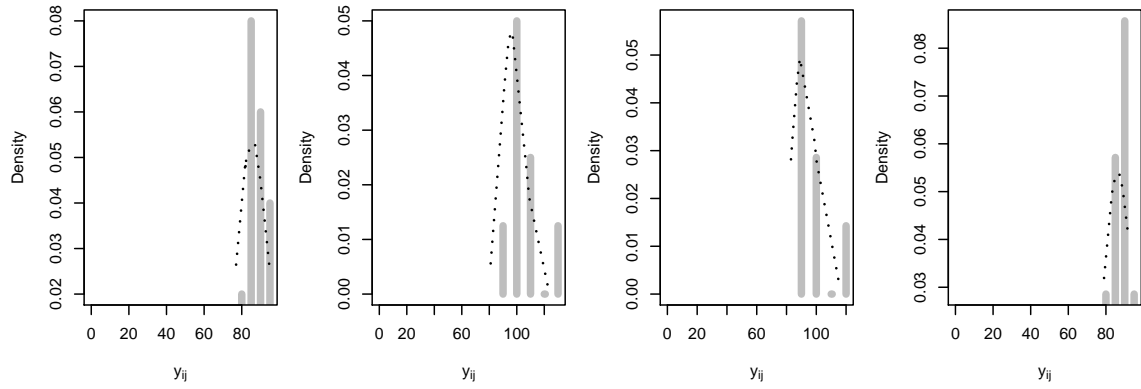

(a) BM28 protein expression in four different tumors

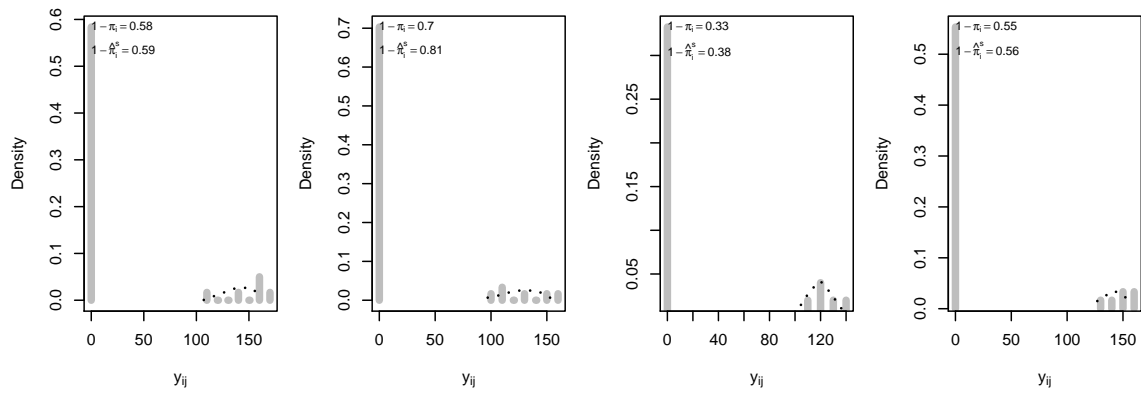

(b) AMACR protein expression in four different tumors

Supplementary Figure 2. Reconstructed tumor expression. Dotted lines are CMM fitted
